# Supplementary material for: Long non-coding RNA SNHG1 indicates poor prognosis and facilitates disease progression in acute myeloid leukemia
Source: PubMed Central journal article supplement (PMC6826290; doi:10.1242/bio.046417), 2019-10-15
Supplement: biolopen-8-046417-s1.pdf [file biolopen-8-046417-s1.pdf]

**Table S1. Clinical characteristics of AML patients using 2016 WHO classification**

| Variables                                             | n  | SNHG1 expression |          |
|-------------------------------------------------------|----|------------------|----------|
|                                                       |    | High (44)        | Low (45) |
| AML with t(8;21)(q22;q22.1)                           | 9  | 2                | 7        |
| AML with inv(16)(p13.1q22) or<br>t(16;16)(p13.1;q22)  | 4  | 1                | 3        |
| AML with t(9;11)(p21.3;q23.3)                         | 3  | 1                | 2        |
| AML with t(6;9)(p23;q34.1)                            | 4  | 4                | 0        |
| AML with inv(3)(q21.3q26.2) or<br>t(3;3)(q21.3;q26.2) | 4  | 1                | 3        |
| AML with mutated <i>NPM1</i>                          | 11 | 6                | 5        |
| AML with biallelic mutations of <i>CEBPA</i>          | 12 | 7                | 5        |
| AML with myelodysplasia-related changes               | 14 | 8                | 6        |
| AML, NOS                                              |    |                  |          |
| AML with minimal differentiation                      | 1  | 1                | 0        |
| AML without maturation                                | 6  | 4                | 2        |
| AML with maturation                                   | 13 | 6                | 7        |
| Acute myelomonocytic leukemia                         | 5  | 2                | 3        |
| Acute monoblastic/monocytic leukemia                  | 2  | 1                | 1        |
| Pure erythroid leukemia                               | 1  | 0                | 1        |

NOS, not otherwise specified.

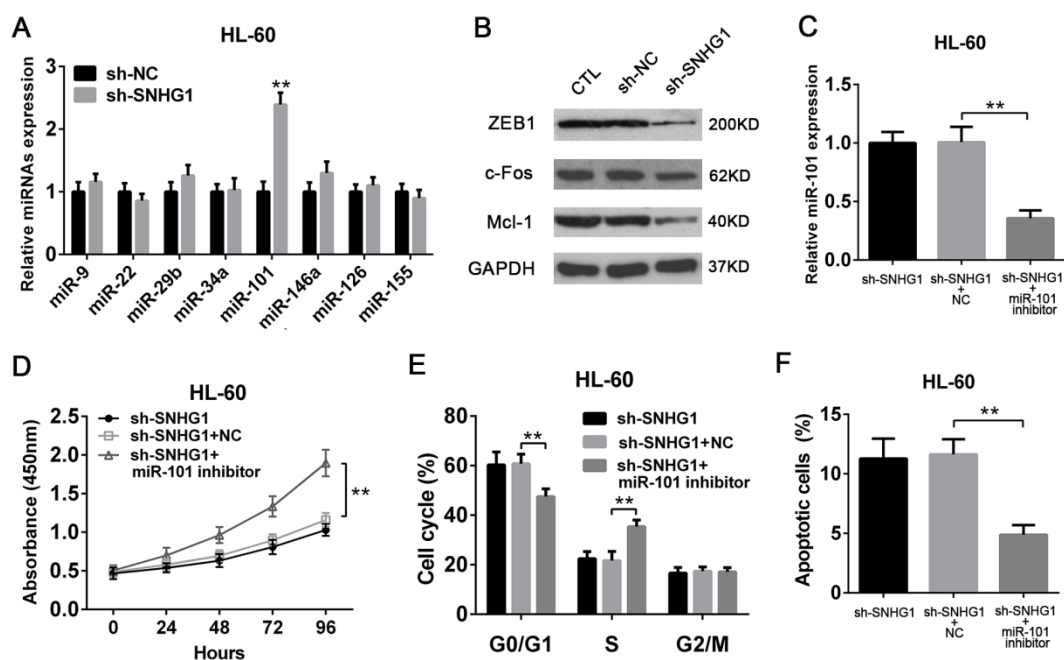

**Figure S1. SNHG1 promotes the progression of AML by negatively regulating miR-101.** (A) The relative expressions of miR-9, miR-22, miR-29b, miR-34a, miR-101, miR-126, miR-146a and miR-155 in HL-60 cells after knockdown of SNHG1 (n = 6). (B) Western blotting detecting the expressions of c-Fos, ZEB1 and Mcl-1 in HL-60 cells after knockdown of SNHG1. (C-F) HL-60 cells with or without knockdown of SNHG1 were transfected with miR-101 inhibitor or negative control (NC). Then, (C) the expression of miR-101 was analyzed by qPCR. Meanwhile, the (D) proliferation was measured by the CCK-8 assay, and the (E) cell cycle and (F) apoptosis were detected by flow cytometry (n = 6). \*\*p < 0.01.
